# Supplementary material for: High expression of miR-125b-2 and SNORD116 noncoding RNA clusters characterize ERG-related B cell precursor acute lymphoblastic leukemia
Source: PubMed Central journal article supplement (PMC5522075; doi:10.18632/oncotarget.16392), 2017-03-21
Supplement: oncotarget-08-42398-s003.pdf [file oncotarget-08-42398-s003.pdf]

**Supplementary table 4:** Probe sets classifying ERG-related patients

| Probe set    | Gene symbol       | Probe set    | Gene symbol  |
|--------------|-------------------|--------------|--------------|
| 228863_at    | PCDH17            | 219789_at    | NPR3         |
| 227289_at    | PCDH17            | 239826_at    | NA           |
| 205656_at    | PCDH17            | 237261_at    | ANGPT2       |
| 1554343_a_at | STAP1             | 235751_s_at  | VMO1         |
| 209602_s_at  | GATA3             | 219225_at    | PGBD5        |
| 230537_at    | NA                | 207345_at    | FST          |
| 240758_at    | NA                | 205423_at    | AP1B1        |
| 219489_s_at  | NXN               | 227358_at    | ZBTB46       |
| 203921_at    | CHST2             | 1563113_at   | UBR4         |
| 239956_at    | NA                | 227370_at    | FAM171B      |
| 206756_at    | CHST7             | 213272_s_at  | TMEM159      |
| 235146_at    | TMCC3             | 38918_at     | SOX13        |
| 202409_at    | IGF2 /// INS-IGF2 | 236501_at    | SALL4        |
| 244665_at    | NA                | 210258_at    | RGS13        |
| 206067_s_at  | WT1               | 226499_at    | NRARP        |
| 202747_s_at  | ITM2A             | 209736_at    | SOX13        |
| 209603_at    | GATA3             | 244509_at    | GPR155       |
| 233038_at    | NA                | 203448_s_at  | TERF1        |
| 215146_s_at  | TTC28             | 229677_at    | SLC39A3      |
| 234196_at    | NA                | 217606_at    | NA           |
| 233225_at    | NA                | 211209_x_at  | SH2D1A       |
| 235343_at    | VASH2             | 200753_x_at  | SFRS2        |
| 225611_at    | MAST4             | 213060_s_at  | CHI3L2       |
| 231600_at    | CLEC12B           | 219790_s_at  | NPR3         |
| 209959_at    | NR4A3             | 238091_at    | LOC100506388 |
| 232227_at    | LOC100505976      | 1554258_a_at | DNAJC5B      |
| 235968_at    | AGAP1             | 207815_at    | PF4V1        |
| 213058_at    | TTC28             | 207518_at    | DGKE         |
| 229091_s_at  | CCNJ              | 35156_at     | R3HCC1       |
| 205572_at    | ANGPT2            | 203110_at    | PTK2B        |
| 226489_at    | TMCC3             | 201700_at    | CCND3        |
| 238865_at    | PABPC4L           | 214716_at    | BMP2K        |
| 209875_s_at  | SPP1              | 37170_at     | BMP2K        |
| 219470_x_at  | CCNJ              | 221558_s_at  | LEF1         |
| 1556592_at   | NA                | 201889_at    | FAM3C        |
| 225369_at    | ESAM              | 210948_s_at  | LEF1         |
| 223627_at    | MEX3B             | 230069_at    | SFXN1        |
| 225532_at    | CABLES1           | 231793_s_at  | CAMK2D       |
| 229661_at    | SALL4             | 209781_s_at  | KHDRBS3      |
| 216979_at    | NR4A3             | 225019_at    | CAMK2D       |
| 231357_at    | CLEC12B           | 220952_s_at  | PLEKHA5      |
| 201200_at    | CREG1             | 203066_at    | CHST15       |
| 219227_at    | CCNJL             | 227486_at    | NT5E         |
| 242218_at    | PPARD             | 205289_at    | BMP2         |
| 1555216_a_at | LOC645722         | 205290_s_at  | BMP2         |
| 224374_s_at  | EMILIN2           |              |              |
