# Supplementary material for: High expression of miR-125b-2 and SNORD116 noncoding RNA clusters characterize ERG-related B cell precursor acute lymphoblastic leukemia
Source: PubMed Central journal article supplement (PMC5522075; doi:10.18632/oncotarget.16392), 2017-03-21
Supplement: oncotarget-08-42398-s004.pdf [file oncotarget-08-42398-s004.pdf]

**Supplementary table 5:** Summary of aberrations on *ERG* gDNA and mRNA identified in *ERG*-related patients carrying the *ERG* intragenic deletion.

| SAMPLE | N. BREAK POINTS | EXON 2-PROXIMAL BREAKPOINT |                  | INSERT     | EXON 10-PROXIMAL BREAKPOINT |          |        | ABERRANT <i>ERG</i> TRANSCRIPTS |
|--------|-----------------|----------------------------|------------------|------------|-----------------------------|----------|--------|---------------------------------|
|        |                 | POSITION                   | SEQUENCE         | SEQUENCE   | SEQUENCE                    | POSITION | INTRON |                                 |
| 1      | 1               | 222327                     | AAAGCCCAAGT      | GGCCC      | CCTAAACGTTGAGGCCAA          | 271826   | 9      | EX2-EX10                        |
| 2      | 1               | 222327                     | AAAGCCCAAGT      | AGAGGGCC   | AACGTTGAGGCCAA              | 271830   | 9      | EX2-EX10                        |
| 3      | 1               | 222331                     | AAAGCCCAAGTGTC   | CCCCCAG    | CGTTGAGGCCAA                | 271832   | 9      | EX2-EX10                        |
| 4      | 1**             | ND                         | ND               | ND         | ND                          | ND       | ND     | EX2-EX10                        |
| 5      | 1**             | ND                         | ND               | ND         | ND                          | ND       | ND     | EX2-EX10, EX2-EX9, EX2-EX8      |
| 6      | 1               | 222322                     | AAAGCCC          | ATC        | TGTTTATCTT                  | 269825   | 7      | EX2-EX10*, EX2-EX9, EX2-EX8     |
| 7      | 1               | 222329                     | AAAGCCCAAGTGT    | CCCCCCT    | TGTGTGTCAGTCTCTGTGCCAAA     | 271290   | 9      | EX2-EX10                        |
| 8      | 2**             | ND                         | ND               | ND         | ND                          | ND       | ND     | EX2-EX9*, EX2-EX8*              |
|        |                 | ND                         | ND               | ND         | ND                          | ND       | ND     |                                 |
| 9      | 4               | 222332                     | AAAGCCCAAGTGTTCA | AACC       | CTTCTCAGCCTTC               | 272238   | 9      | EX2-EX10*, EX2-EX9, EX2-EX8     |
|        |                 | 222332                     | AAAGCCCAAGTGTTCA | no insert  | ATTCCTAAACGTTGAGGCCAA       | 271822   | 9      |                                 |
|        |                 | 222325                     | AAAGCCCAA        | no insert  | ACGTTGAGGCCAA               | 271831   | 9      |                                 |
|        |                 | 222327                     | AAAGCCCAAGT      | CCCCCCC    | TCTTCTCAGCCTTC              | 272237   | 9      |                                 |
| 10     | 6               | 222324                     | AAAGCCCA         | GGTAGG     | CTCTGTGCCAAA                | 271301   | 9      | EX2-EX10, EX2-EX9, EX2-EX8      |
|        |                 | 222329                     | AAAGCCCAAGTGT    | CCCC       | GTCTTCTCAGCCTTC             | 272234   | 9      |                                 |
|        |                 | 222321                     | AAAGCC           | TCGTTGCGCG | TCTTCTCAGCCTTC              | 272237   | 9      |                                 |
|        |                 | 222330                     | AAAGCCCAAGTGTT   | TAGGGAG    | ACGTTGAGGCCAA               | 271831   | 9      |                                 |
|        |                 | 222326                     | AAAGCCCAAG       | CGTTA      | TATTCCTAAACGTTGAGGCCAA      | 271821   | 9      |                                 |
|        |                 | 222331                     | AAAGCCCAAGTGTC   | no insert  | CCTAAACGTTGAGGCCAA          | 271826   | 9      |                                 |
| 11     | 14              | 222323                     | AAAGCCCC         | CGGCG      | CTTCTCAGCCTTC               | 272238   | 9      | EX2-EX10, EX2-EX9, EX2-EX8      |
|        |                 | 222327                     | AAAGCCCAAGT      | CGAA       | CTTCTCAGCCTTC               | 272238   | 9      |                                 |
|        |                 | 222327                     | AAAGCCCAAGT      | C          | CTTCTCAGCCTTC               | 272238   | 9      |                                 |
|        |                 | 222329                     | AAAGCCCAAGTGT    | CCCTCCCC   | GTCTTCTCAGCCTTC             | 272234   | 9      |                                 |
|        |                 | 222323                     | AAAGCCCC         | C          | GTCTTCTCAGCCTTC             | 272234   | 9      |                                 |
|        |                 | 222323                     | AAAGCCCC         | no insert  | CGTCTTCTCAGCCTTC            | 272233   | 9      |                                 |
|        |                 | 222327                     | AAAGCCCAAGT      | no insert  | GTCTTCTCAGCCTTC             | 272234   | 9      |                                 |
|        |                 | 222327                     | AAAGCCCAAGT      | TCCC       | GTCTTCTCAGCCTTC             | 272234   | 9      |                                 |
|        |                 | 222328                     | AAAGCCCAAGTG     | CCTCCTAG   | GGCAA                       | 271838   | 9      |                                 |
|        |                 | 222329                     | AAAGCCCAAGTGT    | CGAGG      | CTTCTCAGCCTTC               | 272238   | 9      |                                 |
|        |                 | 222332                     | AAAGCCCAAGTGTTCA | GGC        | GTCTTCTCAGCCTTC             | 272234   | 9      |                                 |
|        |                 | 222332                     | AAAGCCCAAGTGTTCA | GGG        | CTTCTCAGCCTTC               | 272236   | 9      |                                 |
|        |                 | 222331                     | AAAGCCCAAGTGTC   | CCCGAGG    | CCTAAACGTTGAGGCCAA          | 271826   | 9      |                                 |
|        |                 | 222327                     | AAAGCCCAAGT      | TCACACC    | CAGTCTGTGCCAAA              | 271297   | 9      |                                 |
| 12     | ND              | ND                         | ND               | ND         | ND                          | ND       | ND     | EX2-EX10                        |
| 13     | ND              | ND                         | ND               | ND         | ND                          | ND       | ND     | EX2-EX10                        |
| 14     | ND              | ND                         | ND               | ND         | ND                          | ND       | ND     | EX2-EX10                        |

Different breakpoints, position on the gene *ERG*, sequences and inserts identified by analysis of gDNA in 11 patients are listed. Type of aberrant *ERG* transcripts identified by analysis of mRNA in 14 patients are listed. *ERG* gene ID 2078, NG\_029732.1; exons numbering according to *ERG* isoform 1 (NM\_182918). \**ERG* transcripts inferred by the size of PCR products and not confirmed by sequencing; \*\*Breakpoints inferred by the size of PCR products and not confirmed by sequencing.
