# Supplementary material for: High expression of miR-125b-2 and SNORD116 noncoding RNA clusters characterize ERG-related B cell precursor acute lymphoblastic leukemia
Source: PubMed Central journal article supplement (PMC5522075; doi:10.18632/oncotarget.16392), 2017-03-21
Supplement: oncotarget-08-42398-s007.pdf [file oncotarget-08-42398-s007.pdf]

**Supplementary table 8:** Complete sequence and structure of snoRNAs in the SNORD116 cluster are listed.

| Probe set       | Transcript Name | Transcript ID   | SNOG  | Expression                            | Sequence (5'-C box-ASE 2-C' box-D' box-ASE 1-D box-3')                                       | ASE 1 3'-5'                       | ASE 2 3'-5'                     |
|-----------------|-----------------|-----------------|-------|---------------------------------------|----------------------------------------------------------------------------------------------|-----------------------------------|---------------------------------|
| HBII-85-24_x_st | SNORD116-24-201 | ENST00000384549 | SNOG2 | High in ERG-related group             | GGATCGATGATGACTTTTATACATGATTCCTTGGAAAGCTGAACAAAATGAGTGAAAACCTATACCGTCATCTCGTGAACCTGAGGTCC    | AAGTGTCTTCTACTGC<br>CATATCTCAAAA  | GAAGGTTCTTACGTA<br>CATATTTTC    |
| HBII-85-21_x_st | SNORD116-20-201 | ENST00000384507 | SNOG2 | High in ERG-related group             | GGATCGATGATGACTCCACATATACATTCCTTGGAAAGCTGAACAAAATGAGTGAAAACCTATACCGTCATCTCGTGAACCTGAGGTCC    | AAGCTGCTCTACTGC<br>CATATCTCAAAA   | GAAGGTTCTTACATA<br>TACACCTTC    |
| HBII-85-20_x_st | SNORD116-20-202 | ENST00000384529 | SNOG2 | High in ERG-related group             | GGATCGATGATGACTCCATATACATTCCTTGGAAAGCTGAACAAAATGAGTGAAAACCTATACCGTCATCTCGTGAACCTGAGGTCC      | AAGCTGCTCTACTGC<br>CATATCTCAAAA   | GAAGGTTCTTACATA<br>TATACCTTC    |
| HBII-85-23_x_st | SNORD116-23-201 | ENST00000384533 | SNOG2 | High in ERG-related group             | GGATCGATGATGACTCCATATACATTCCTTGGAAAGCTGAACAAAATGAGTGAAAACCTATACCGTCATCTCGTGAACCTGAGGTCC      | AAACTGCTCTACTGC<br>CATATCTCAAAA   | GAAGGTTCTTACGTA<br>CATACTTTC    |
| HBII-85-11_x_st | SNORD116-11-201 | ENST00000383882 | SNOG2 | High in ERG-related group             | GGATCAATGATGACTCCATATACATTCCTTGGAAAGCTGAACAAAATGAGTGAAAACCTATACCGTCATCTCGTGAACCTGAGGTCC      | AAATCTCTCTACTGC<br>ATATTTTCAAAA   | TGAAGGTTCTTGGGT<br>GCATACCTTC   |
| HBII-85-14_x_st | SNORD116-14-201 | ENST00000383894 | SNOG2 | High in ERG-related group             | GGATCGATGATGACTCCATATACATTCCTTGGAAAGCTGAACAAAATGAGTGAAAACCTATACCGTCATCTCGTGAACCTGAGGTCC      | AAGCTGCTCTACTGC<br>CATATCTCAAAA   | GAAGGTTCTTACATA<br>TATACCTTC    |
| HBII-85-16_x_st | SNORD116-16-201 | ENST00000384533 | SNOG2 | High in ERG-related group             | GGATCGATGATGACTCCATATACATTCCTTGGAAAGCTGAACAAAATGAGTGAAAACCTATACCGTCATCTCGTGAACCTGAGGTCC      | AAGCTGCTCTACTGC<br>CATATCTCAAAA   | GAAGGTTCTTACGTA<br>CATACTTTC    |
| HBII-85-17_x_st | SNORD116-17-201 | ENST00000383929 | SNOG2 | High in ERG-related group             | GGATCGATGATGACTCCATATACATTCCTTGGAAAGCTGAACAAAATGAGTGAAAACCTATACCGTCATCTCGTGAACCTGAGGTCC      | AAGCTGCTCTACTGC<br>CATATCTCAAAA   | GAAGGTTCTTACATA<br>TATACCTTC    |
| HBII-85-15_x_st | SNORD116-15-201 | ENST00000384445 | SNOG2 | High in ERG-related group             | GGATCGATGATGACTCCATATACATTCCTTGGAAAGCTGAACAAAATGAGTGAAAACCTATACCGTCATCTCGTGAACCTGAGGTCC      | AAACTGCTCTACTGC<br>CATATCTCAAAA   | GAAGGTTCTTACATA<br>TATACCTTC    |
| HBII-85-22_x_st | SNORD116-22-201 | ENST00000384430 | SNOG2 | High in ERG-related group             | GGATCGATGATGACTCCATATACATTCCTTGGAAAGCTGAACAAAATGAGTGAAAACCTATACCGTCATCTCGTGAACCTGAGGTCC      | AAGCTGCTCTACTGC<br>CATATCTCAAAA   | GAAGGTTCTTACAGT<br>TATACCTTC    |
| HBII-85-18_x_st | SNORD116-18-201 | ENST00000383951 | SNOG2 | High in ERG-related group             | GGATCGATGATGACTCCATATACATTCCTTGGAAAGCTGAACAAAATGAGTGAAAACCTATACCGTCATCTCGTGAACCTGAGGTCC      | AAGCTGCTCTACTGC<br>CATATCTCAAAA   | GAAGGTTCTTACATA<br>TATCTTCTTC   |
| HBII-85-27_x_st | SNORD116-27-201 | ENST00000516087 | SNOG3 | High in ERG-related group             | GGATCGATGATGACTTAAAGATTTATCTAAATTAATCTGAACAAAATGAGTGACCAAAACCTCTGTACCACTCTGTGAGCTGAGGTCC     | GAGTGTCTTACCAGTG<br>TCTTCAAAAACA  | TAAATTTAATCTATTAG<br>AAATTC     |
| HBII-85-28_x_st | SNORD116-28-201 | ENST00000516123 | SNOG3 | Variable expression in the two groups | GGATCGATGATGACTTAAAGATTTATCTAAATTAATCTGAACAAAATGAGTGACCAAAACCTCTGTACCACTCTGTGAGCTGAGGTCC     | AAGTGTCTTACCAGTG<br>TCTTCAAAAACA  | TAAAGTGTCTTAAAGTA<br>AAATTC     |
| HBII-85-13_x_st | SNORD116-13-201 | ENST00000384408 | SNOG2 | Variable expression in the two groups | GGATCGATGATGACTCCATATACATTCCTTGGAAAGCTGAACAAAATGAGTGAAAACCTATACCGTCATCTCGTGAACCTGAGGTCC      | AAGTGTCTTACTACT<br>CATGTCTCAAGG   | GAAGGTTCTTACGTA<br>TACTACTTC    |
| HBII-85-8_x_st  | SNORD116-8-201  | ENST00000384365 | SNOG1 | Variable expression in the two groups | GGATCGATGATGACTCCCAAAAAAACATTCCTTGGAAAGCTGAACAAAATGAGTGAAAACCTATACCGTCATCTCGTGAACCTGAGGTCC   | AAGCTGCTCTACTGC<br>CCATCTCAAGA    | GAAGGTTCTTACAA<br>AAAAACCTCTGC  |
| HBII-85-1_x_st  | SNORD116-1-201  | ENST00000384335 | SNOG1 | Variable expression in the two groups | GGATCGATGATGACTCCCAAAAAAACATTCCTTGGAAAGCTGAACAAAATGAGTGAAAACCTATACCGTCATCTCGTGAACCTGAGGTCC   | AAGCTGCTCTACTGC<br>CCATCTCAAGA    | GAAGGTTCTTACAA<br>AAAAACCTCTGC  |
| HBII-85-2_x_st  | SNORD116-2-201  | ENST00000384274 | SNOG1 | Variable expression in the two groups | GGATCGATGATGACTCCCAAAAAAACATTCCTTGGAAAGCTGAACAAAATGAGTGAAAACCTATACCGTCATCTCGTGAACCTGAGGTCC   | AAGCTGCTCTACTGC<br>CCATCTCAAGA    | GAAGGTTCTTACAA<br>AAAAACCTCTGC  |
| HBII-85-29_x_st | SNORD116-29-201 | ENST00000384516 | SNOG3 | Variable expression in the two groups | GGATCGATGATGACTTAAAAAATGAAACCTTGGAAAGCTGAACAAAATGAGTGACCAAGACACTCTGTGAGCTGAGGTCC             | GAGTGTCTTACCAGTA<br>TCTTCAAAAACA  | TAAAGGTTCTTAAAGTA<br>AAAAATTC   |
| HBII-85-25_x_st | SNORD116-25-201 | ENST00000516517 | SNOG3 | Variable expression in the two groups | GGATCGATGATGACTTAAAAATGATCTCATCGGAATCTGAACAAAATGAGTGACCAAACTACTCTGTGCCACTCTGTGAGCTGAGGTCC    | GAGTGTCTTACCAGTG<br>TCTTCAAAAACA  | TAAAGGTTCTTAAAGTA<br>AAAAATTC   |
| HBII-85-5_x_st  | SNORD116-5-201  | ENST00000384462 | SNOG1 | Variable expression in the two groups | GGATCGATGATGACTCCCAAAAAAACATTCCTTGGAAAGCTGAACAAAATGAGTGAAAACCTATACCGTCATCTCGTGAACCTGAGGTCC   | AAGCTGCTCTACTGC<br>CCATCTCAAGA    | GAAGGTTCTTACAA<br>AAAAACCTCTGC  |
| HBII-85-3_x_st  | SNORD116-3-201  | ENST00000384287 | SNOG1 | Variable expression in the two groups | GGATCGATGATGACTCCCAAAAAAACATTCCTTGGAAAGCTGAACAAAATGAGTGAAAACCTATACCGTCATCTCGTGAACCTGAGGTCC   | AAGCTGCTCTACTGC<br>CCATCTCAAGA    | GAAGGTTCTTACAA<br>AAAAACCTCTGC  |
| HBII-85-26_x_st | SNORD116-26-201 | ENST00000516006 | SNOG3 | High in non-ERG-related group         | GGATCGATGATGACTATAAAAAATGGATCTCATCGGAATCTGAACAAAATGAGTGACCAAACTACTCTGTGCCACTCTGTGAGCTGAGGTCC | GAGTGTCTTACCAGTG<br>TCTTACTAAACCA | TAAAGGTTCTTAAAGTA<br>AAAAAATATC |
| HBII-85-10_x_st | SNORD116-4-201  | ENSG00000275529 | SNOG1 | High in non-ERG-related group         | GGATCGATGATGACTCCCAAAAAAACATTCCTTGGAAAGCTGAACAAAATGAGTGAAAACCTATACCGTCATCTCGTGAACCTGAGGTCC   | AAGCTGCTCTACTGC<br>CCATCTCAAAA    | GAAGGTTCTTACAA<br>AAAAACCTCTGC  |
| HBII-85-6_x_st  | SNORD116-6-201  | ENST00000384711 | SNOG1 | High in non-ERG-related group         | GGATCGATGATGACTCCCAAAAAAACATTCCTTGGAAAGCTGAACAAAATGAGTGAAAACCTATACCGTCATCTCGTGAACCTGAGGTCC   | AAGCTGCTCTACTGC<br>CCATCTCAAAA    | GAAGGTTCTTACAA<br>AAAAACCTCTGC  |
| HBII-85-12_x_st | SNORD116-12-201 | ENST00000384468 | SNOG2 | High in non-ERG-related group         | GGATCAATGATGACTCCATATACATTCCTTGGAAAGCTGAATTAATAATGAGTGAAAACCTATACCGTCATCTCGTGAACCTGAGGTCC    | AAGTGTCTTACTACT<br>CATATCTCAAAA   | GAAGGTTCTTACATA<br>TATACCTTC    |

SNORD116 cluster snoRNAs share highly similar structures that include the typical C box (consensus sequence AUGAUGA) near the 5' end, D box (consensus sequence CUGA) near the 3' end, and the C' and D' boxes in the middle of the molecule (consensus sequence CTGAACAAAATGAGTG). Two antisense elements (ASE 1 and ASE 2) are located immediately upstream D and D' boxes, respectively. In the canonical snoRNAs, ASEs guide the complementarity to target RNA molecule (the residue base pairing with the fifth nucleotide upstream D or D' box will be target of modification). When ASE 1 and ASE 2 of SNORD116 cluster are grouped in antisense direction (3'-5') and according to the first 10-12 nucleotide sequence upstream D or D' box, different ASE motifs can be identified (listed in the table). Interestingly, the snoRNAs up-regulated in ERG-related patients share highly similar ASE motifs.

In the table, snoRNA transcripts name and ID according to Ensembl (<http://www.ensembl.org/index.html>), snoRNA groups (SNOG) according to Castle et al., 2010 [16].
